# Supplementary material for: Homozygous editing of multiple genes for accelerated generation of xenotransplantation pigs
Source: HighWire-hosted journal article supplement (doi:10.1101/gr.279709.124), 2025-03-05
Supplement: Supplemental_Figures_.pdf [file Supplemental_Figures_.pdf]

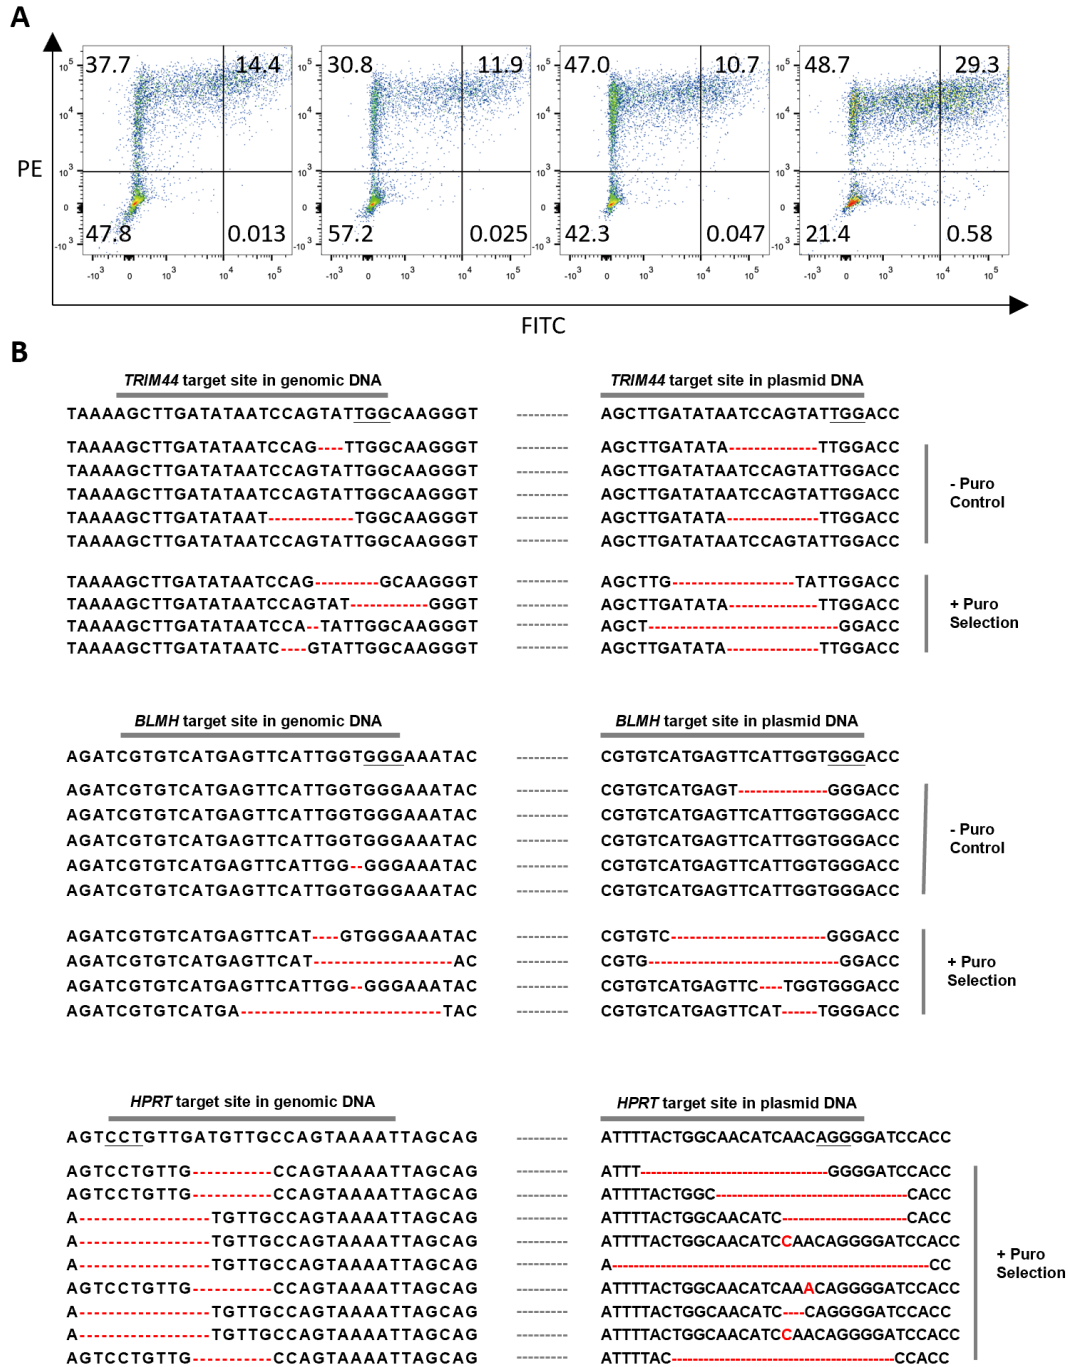

**Fig. S1. The surrogate reporter enables selection of genome targeted cells.** (A) Flow cytometry analysis of PK15 colonies with *CMAH* edits in genomic DNA (PE positive) and plasmid DNA (FITC positive). (B) DNA sequence analysis of *TRIM44*, *BLMH*, and *HPRT* target sites in both genomic DNA and plasmid DNA from single-cell clones.

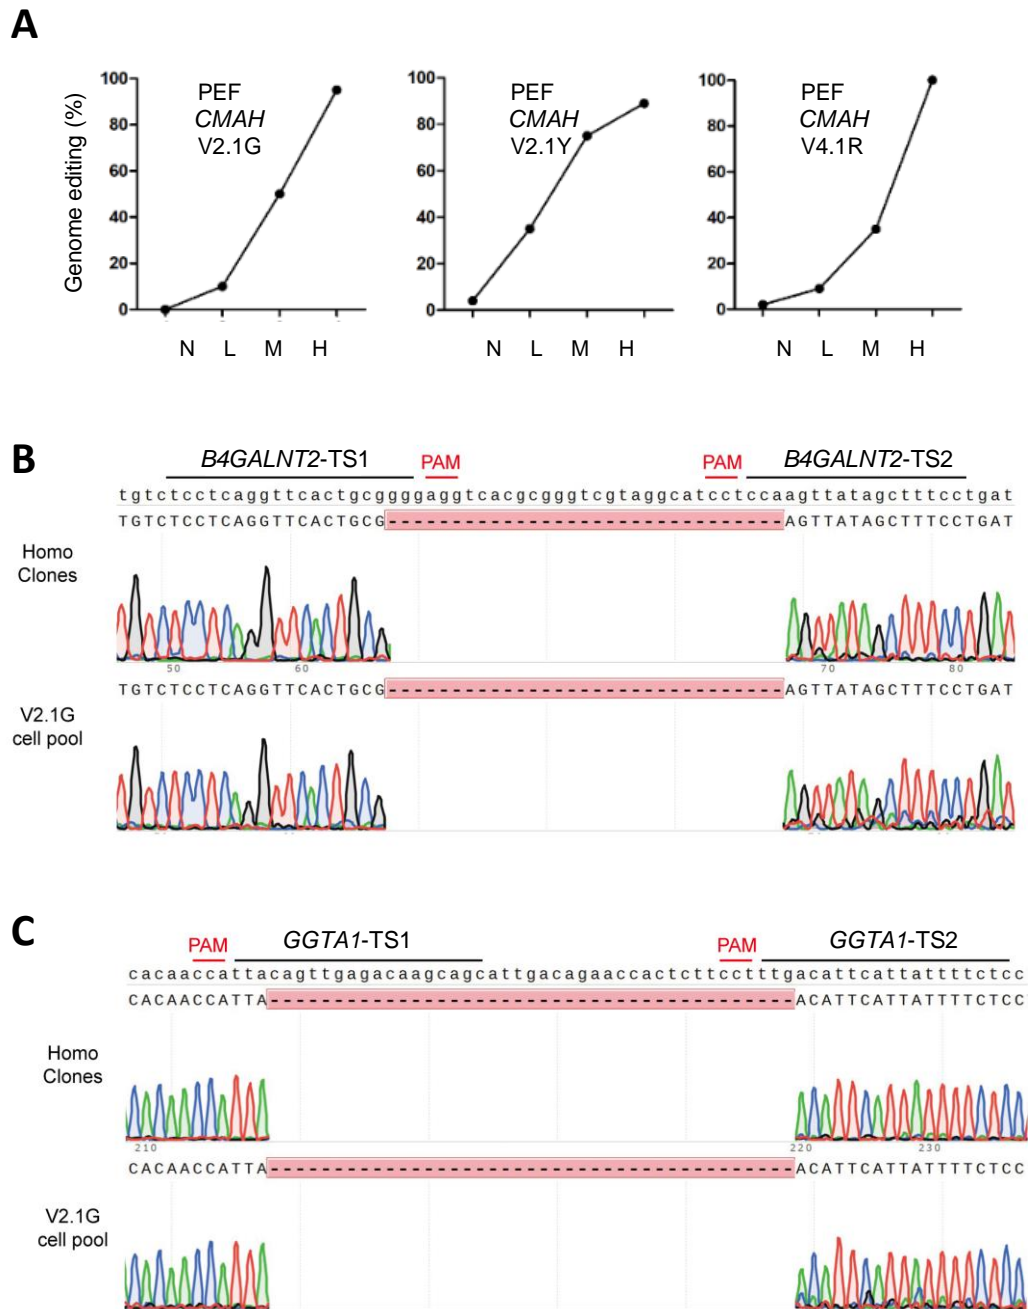

**Fig. S2. The targeting efficiency of cell pools selected by surrogate reporter.** (A) Targeting efficiency of the H (highest FITC intensity), M (medium FITC intensity), L (lowest FITC intensity), and N (FITC negative) groups for *CMAH* in PEFs using V2.1G, V2.1Y, and V4.1R, with *eGFP*, *eYFP* and *tdTomato* as the reporter genes, respectively. In the V4.1R plasmid, *tdTomato* is expressed followed by *BFP*, with the target site inserted between them. (B,C) Representative Sanger sequences of *B4GALNT2* and *GGTA1* target sites in homozygous cell clones and cell pools selected by V2.1G.

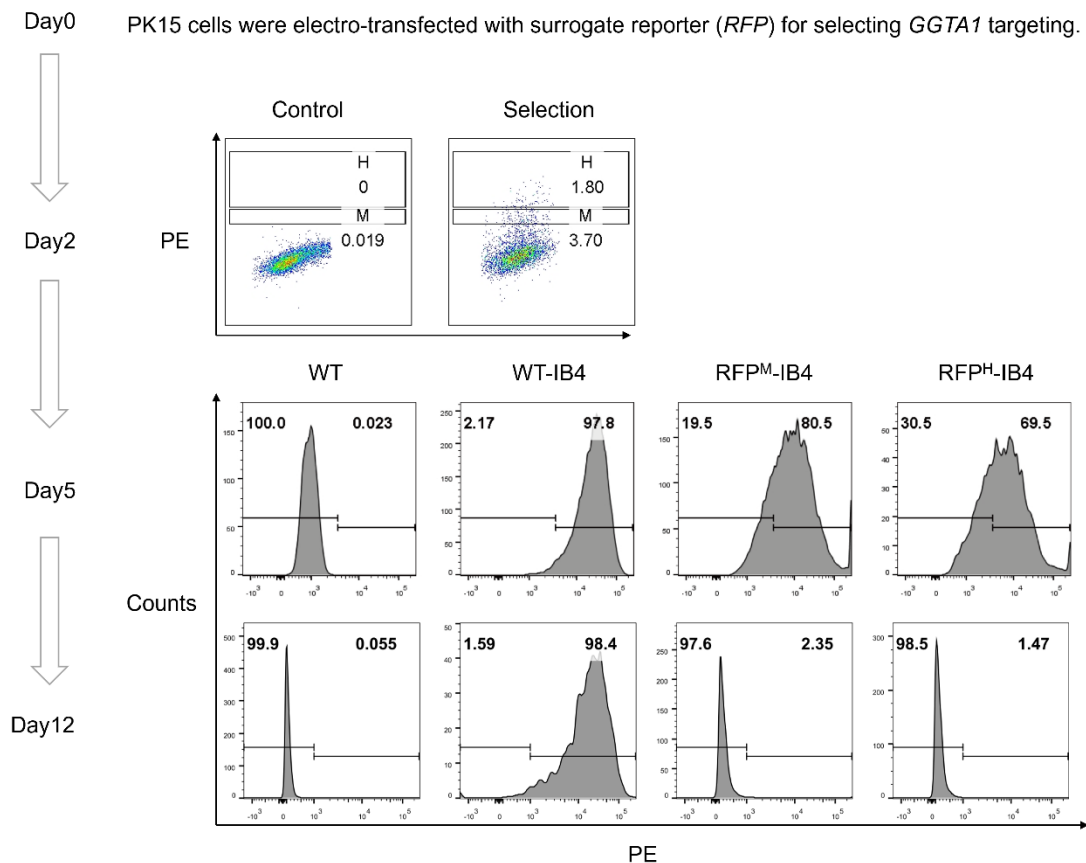

**Fig. S3. Timeline for the elimination of  $\alpha$ -gal epitopes.** A timeline showing the analysis of *GGTA1* knockout. On day 0, PK15 cells were electro-transfected with three plasmids: pM3-Cas9 for expressing Cas9, pCRISPR-sg6-*GGTA1* for expressing *GGTA1* sgRNA, pV4.1R-*GGTA1* for reporting the targeting of *GGTA1*. On day 2, RFP<sup>H</sup> and RFP<sup>M</sup> cells were sorted and cultured. On day 5 and day 12, cells were stained with IB4 lectin to detect the  $\alpha$ -Gal epitopes encoded by *GGTA1*.

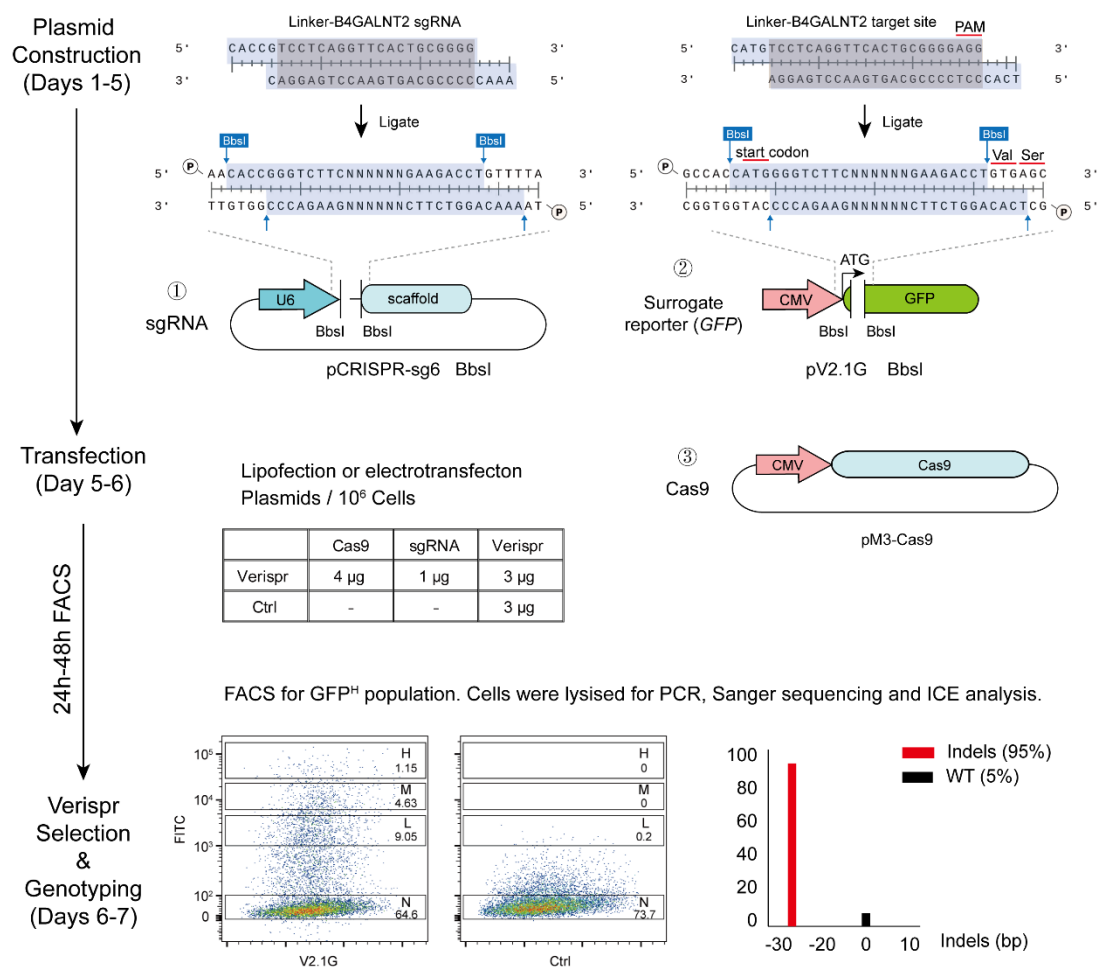

**Fig. S4. Workflow of enrichment for knockout of single genes.** This experiment involves three types of plasmids: a Cas9 expression plasmid (pM3-Cas9), sgRNA expression plasmid (pCRISPR-sg6-TS), and a surrogate reporter plasmid (pV2.1G-TS). Specific sgRNAs were designed using CHOPCHOP, and synthesized oligos were annealed and ligated into the pCRISPR-sg6 backbone cut by BbsI. To construct the surrogate reporter plasmid, the specific target site sequence, containing the PAM sequence, was synthesized, annealed, and ligated into the pV2.1G backbone cut by BbsI. For example, these plasmids were built for the target gene *B4GALNT2*. For genes with poor targeting efficiency, paired sgRNAs are recommended. The three kinds of plasmids are co-transfected into cells, and GFP-positive (GFP<sup>H</sup>) populations were sorted by FACS after 24 - 48 hours. The mixed cell pools can be directly used for the next-step.

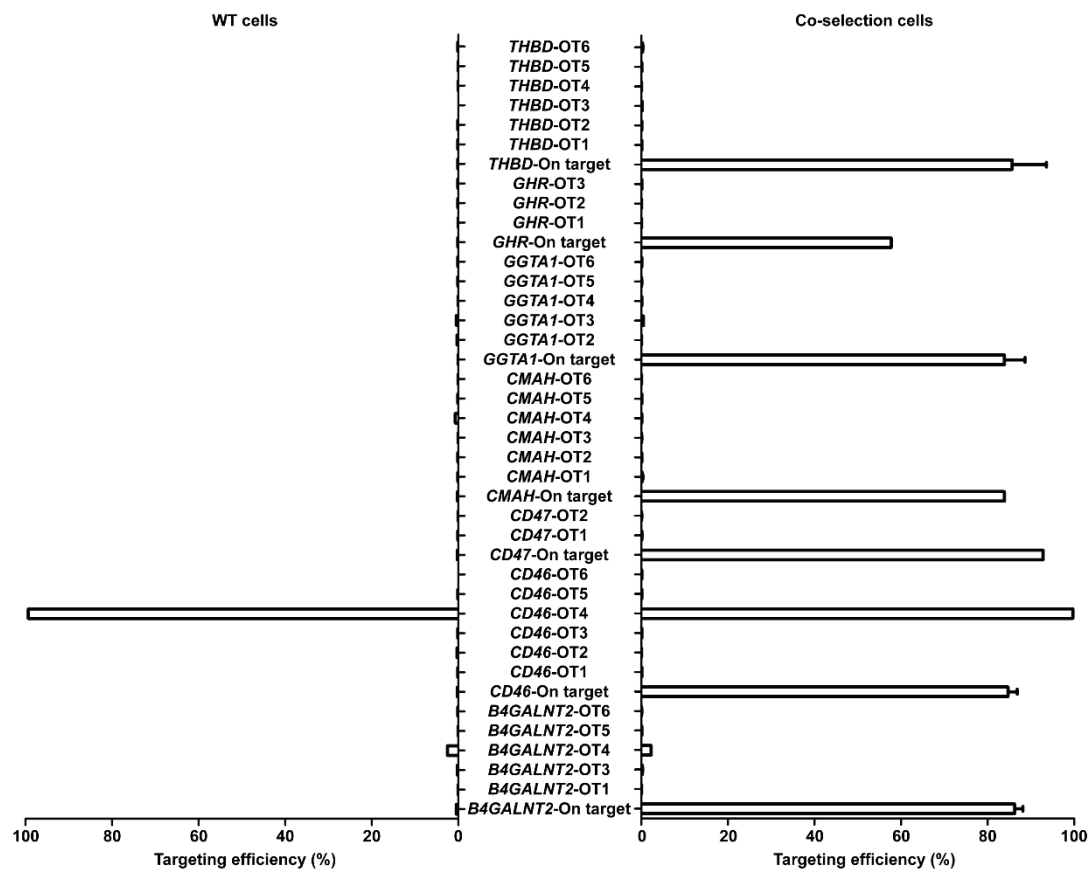

**Fig. S5. Off-target analysis in cells with seven genes simultaneously targeted.** The co-selection cells represent the highest FITC intensity population of porcine fetal fibroblasts (PFFs) edited for seven genes: *GGTA1*, *CMAH*, *B4GALNT2*, *THBD*, *CD46*, *CD47* and *GHR* (Fig. 4). Potential off-target sites for each gene were predicted using Cas-OFFinder. The analysis was conducted in triplicate (n=3).

A

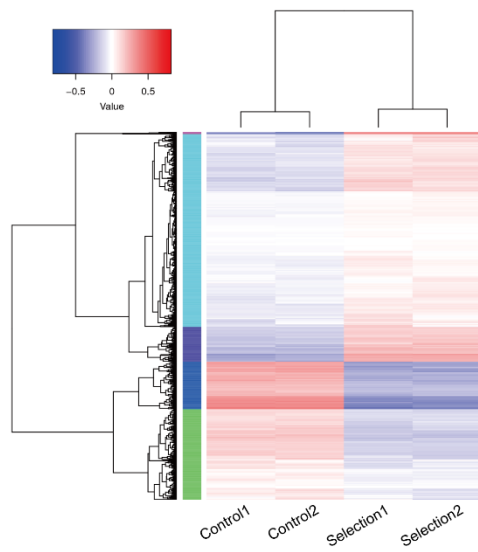

B

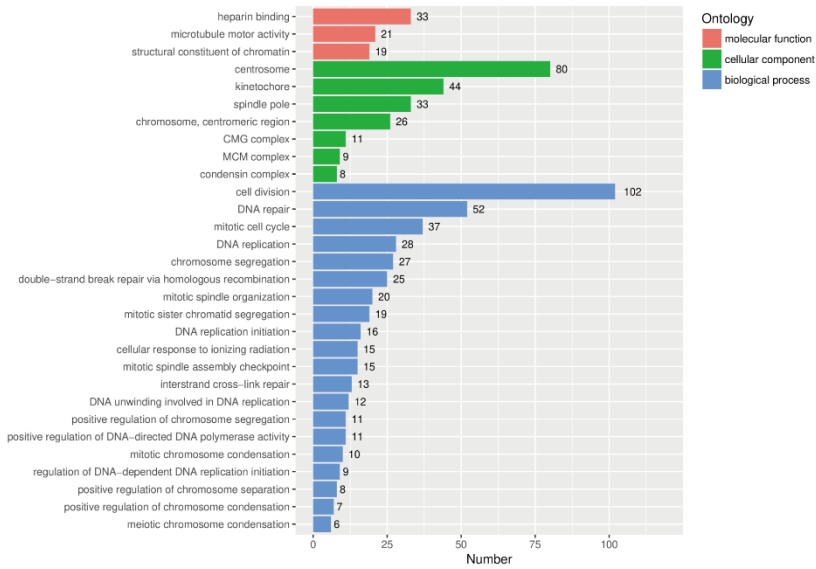

C

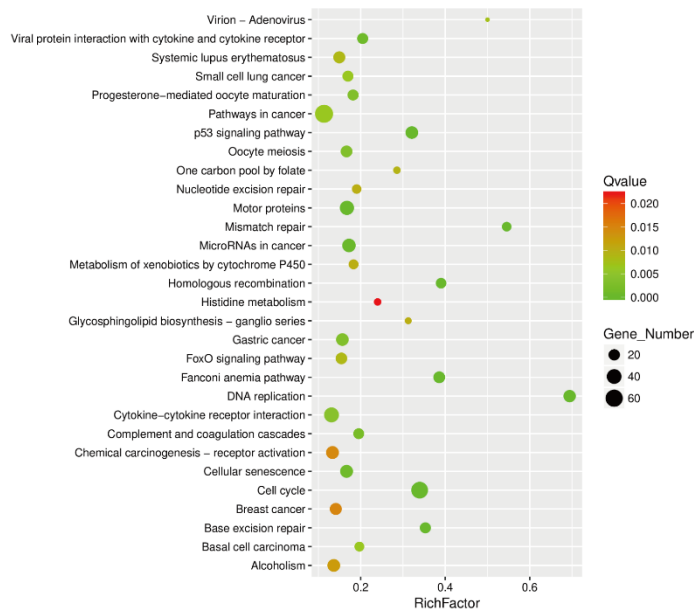

**Fig. S6. RNA-seq analysis of cells simultaneously targeting seven genes.** (A) Clustered heatmap of differential gene expression in control (negative FITC) and selected (highest FITC) PFFs edited for *GGTA1*, *CMAH*, *B4GALNT2*, *THBD*, *CD46*, *CD47* and *GHR*. RNA sequencing was performed on micro-extraction samples (n=2). (B) GO term enrichment analysis for the selection group of cells simultaneously targeting seven genes. (C) KEGG pathway enrichment analysis for the selection group of cells simultaneously targeting seven genes.

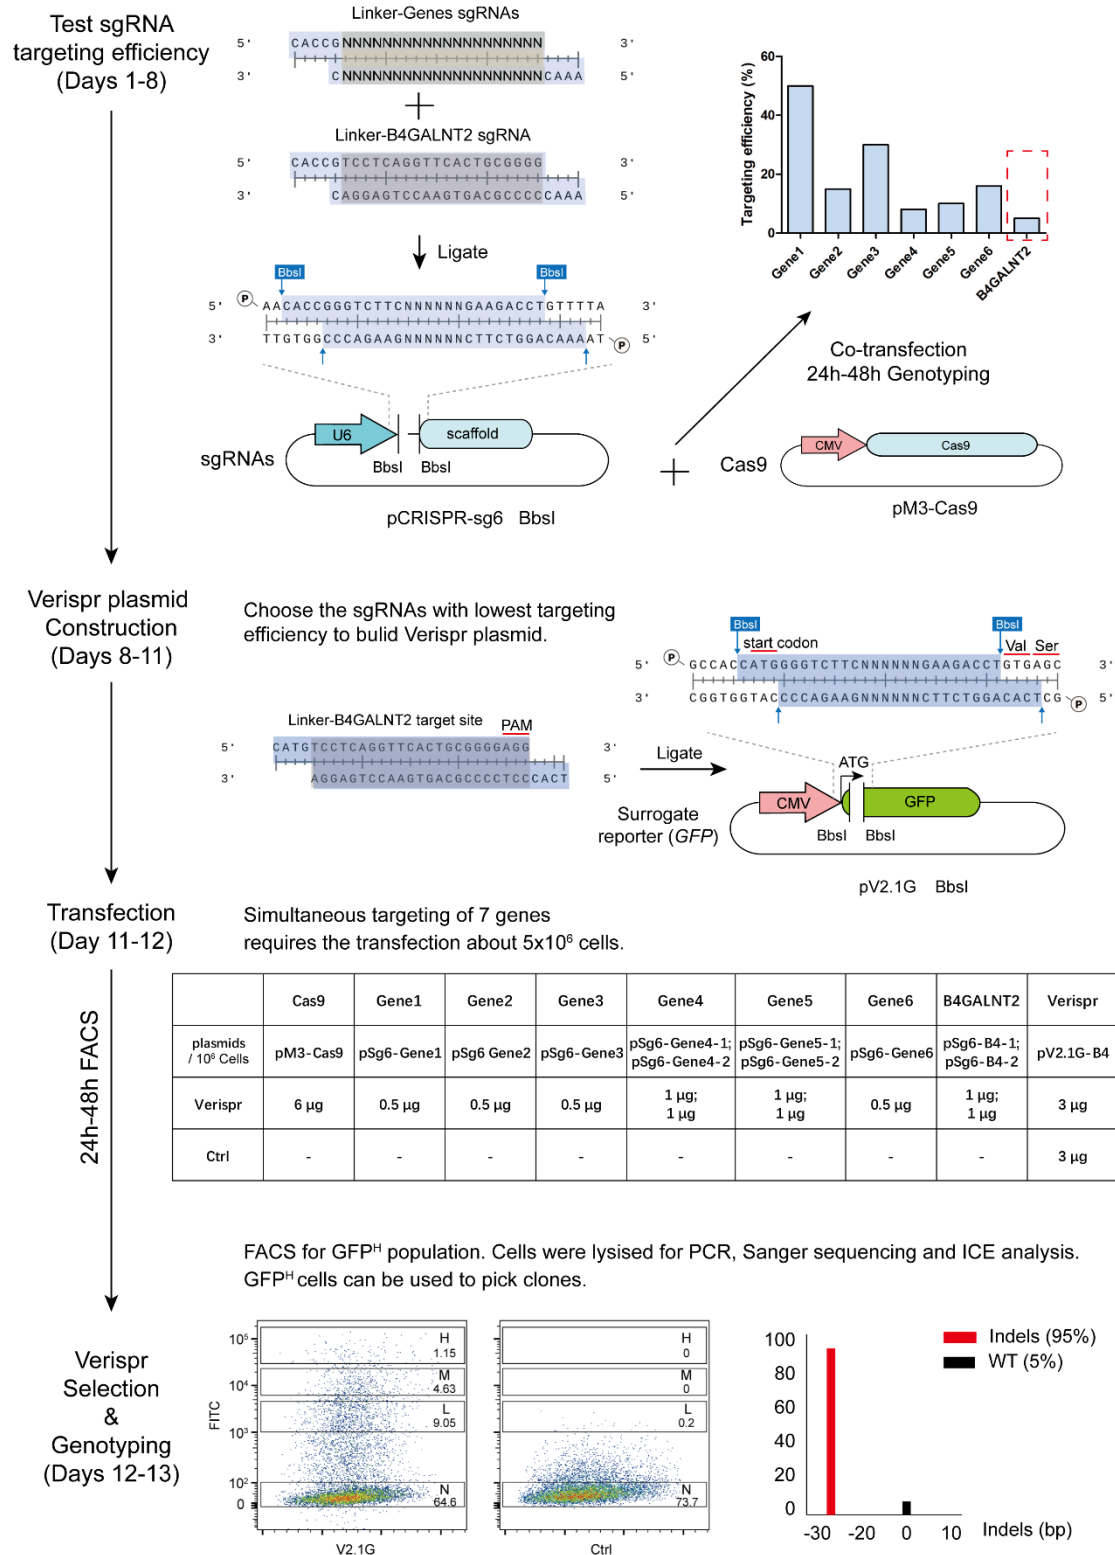

**Fig. S7. Workflow of enrichment for knockout of multiple genes.** To identify optimal target sites for surrogate reporter plasmid construction, the targeting efficiency of various sgRNAs was tested and ranked. The target site, including the PAM sequence for the least effective sgRNA, was then integrated into the pV2.1G backbone digested with BbsI. As with the single-gene knockout workflow, three plasmids were used: a



Cas9 expression plasmid (pM3-Cas9), an sgRNA expression plasmid (pCRISPR-sg6-TS), and a Version 2.1-eGFP-target site plasmid (pV2.1G-TS). The plasmids were co-transfected into cells, and the GFP-positive (GFPH) population was sorted by FACS 24 – 48 hours later. The mixed cell pools were used for subsequent analysis.

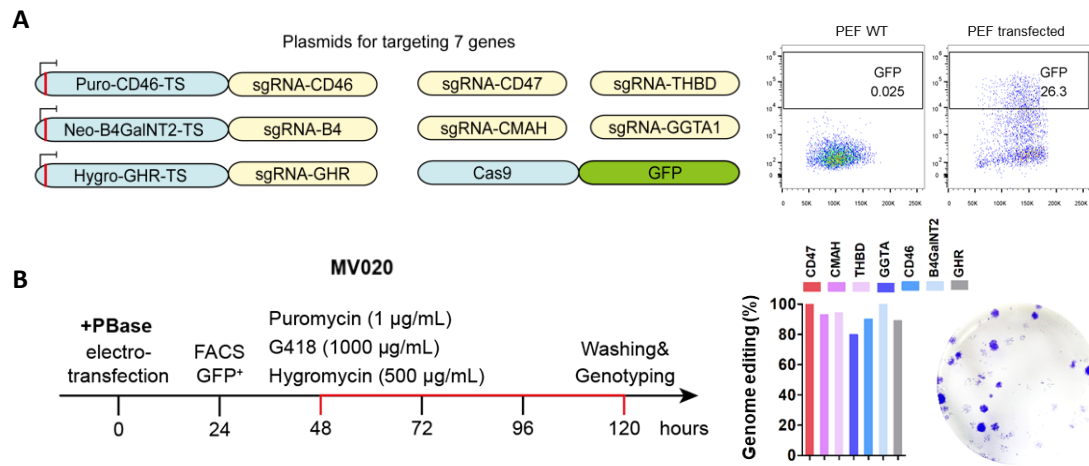

**Fig. S8. Simultaneous targeting of seven genes using integrated drug-resistant surrogate plasmids.** (A) Schematic representation of plasmids designed to target seven endogenous genes in porcine fetal fibroblasts (PEFs). The *Puro*, *Neo*, and *Hygro* surrogate plasmids are utilized for the selection of *CD46*, *B4GALNT2*, and *GHR* targeted cells, respectively. (B) Co-transfection of these plasmids with PBase into PEFs. GFP-positive populations were sorted by FACS within 24-48 hours post-transfection and subjected to puromycin, G418, and hygromycin selection for 4 days. Surviving cells were analyzed for genome editing efficiency across the seven genes and their ability to form cell colonies, which were then stained with crystal violet.

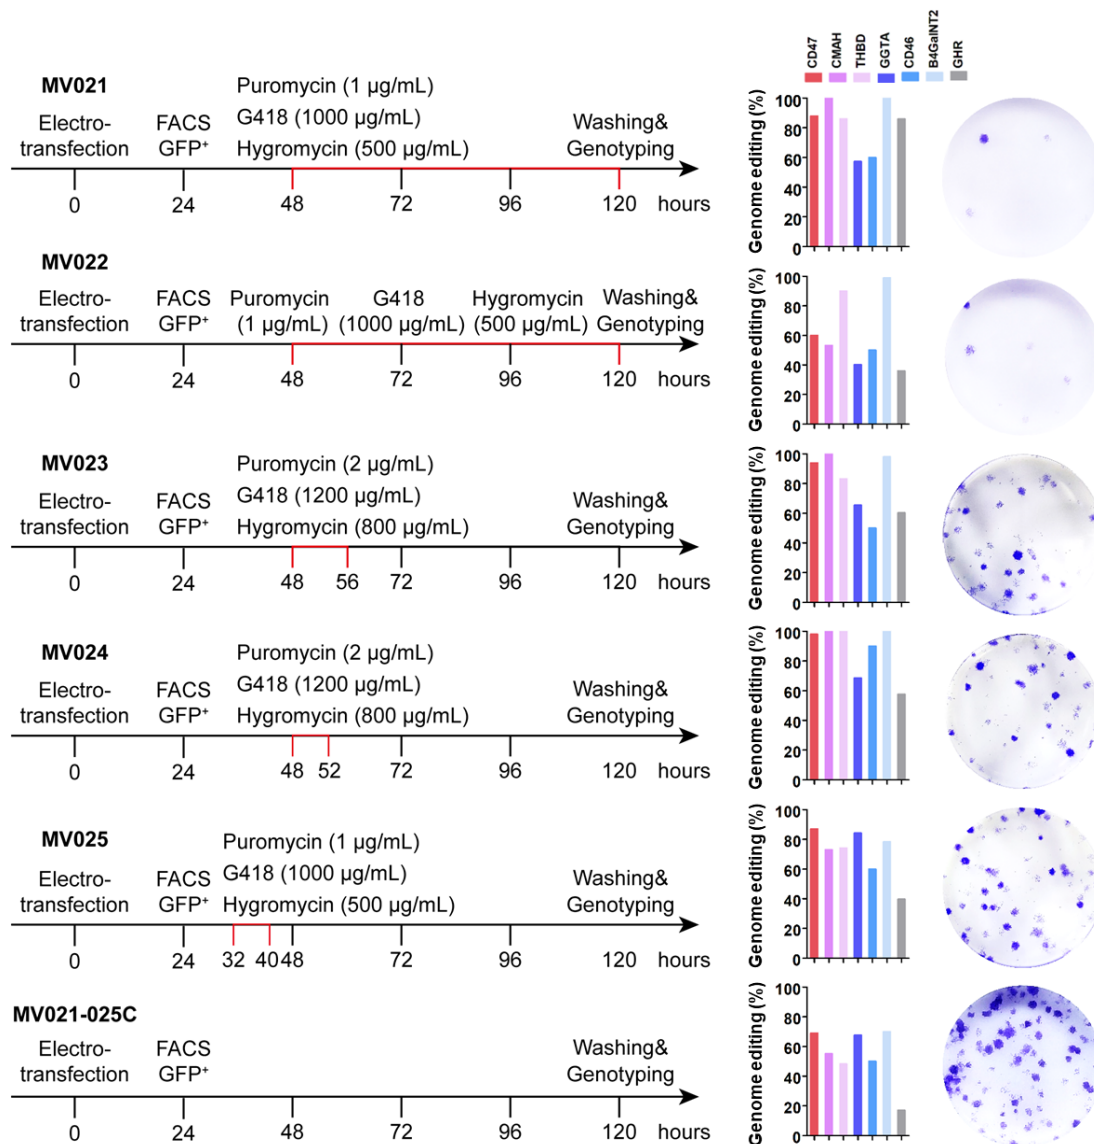

**Fig. S9. Simultaneous targeting of seven genes using unintegrated drug-resistant surrogate plasmids under rigorous drug treatments.** The plasmids depicted in Supplemental Fig. S7A were electro-transfected into PFFs without the PBase plasmid. GFP-positive cells were subjected to different drug treatments (MV021-MV025) or not (MV021-025C). The red line indicates the treatment duration. The remaining cells were analyzed for genome editing efficiency in seven genes and cell colony formation ability. The right panel shows numbered the cell colonies stained by crystal violet.
