# Supplementary material for: Homozygous editing of multiple genes for accelerated generation of xenotransplantation pigs
Source: HighWire-hosted journal article supplement (doi:10.1101/gr.279709.124), 2025-03-05
Supplement: Supplemental_Table_S4.xlsx [file Supplemental_Table_S4.xlsx]

## Sheet: Legend
Supplemental_Table_S4. Oligos used in this study
Primers for plasmid construction, DNA targeting efficiency detection, on-targeting high-throughput sequencing, off-targeting high-throughput sequencing, and qpcr.

## Sheet: Supplemental_Table_S4
Oligos used in this study
Primers for plasmid construction
Primer name	Primer sequence	Note
fwd_Puro.TRIM44	atcttGTGGAAAGGACGAAACACCgAGCTTGATATAATCCAGTATgttttagagctaGAAAtagcaagt	pVerispr-Puro-TRIM44 construction
rev_Puro.TRIM44	ACCGTGGGCTTGTACTCGGTAGCTTGATATAATCCAGTATTGGGGATCCCATGGTGGCgatcGCTAGCTtca
fwd_Puro.HPRT	atcttGTGGAAAGGACGAAACACCgtcttaaccgtaatcagcctcgttttagagctaGAAAtagcaagt	pVerispr-Puro-HPRT construction
rev_Puro.HPRT	ACCGTGGGCTTGTACTCGGTccagaggctgattacggttaagaccGGATCCCATGGTGGCgatcGCTAGCTtca
fwd_Puro.BLMH	atcttGTGGAAAGGACGAAACACCgCGTGTCATGAGTTCATTGGTgttttagagctaGAAAtagcaagt	pVerispr-Puro-BLMH construction
rev_Puro.BLMH	ACCGTGGGCTTGTACTCGGTCCCACCAATGAACTCATGACACGGGATCCCATGGTGGCgatcGCTAGCTtca
rev_puro-2b	GAGGCGCACCGTGGGCTTGTACCTGGACACGCTTGTCGTGCTGCCTCGGTCATGGTGGCgatcGCTAGC	pVerispr-Puro/Neo-Cdkn2b construction
rev_neo-2b	ACCTGCGTGCAATCCATCTTGCCTGGACACGCTTGTCGTGCTGCTTCAATCATGGTGGCgatcGCTAGC
fwd_2b-neo-puro	ctttatatatcttGTGGAAAGGACGAAACACCgGCAGCACGACAAGCGTGTCCgttttagagctaGAAAtagcaa
fwd_Puro.p53	atcttGTGGAAAGGACGAAACACCgTGAGGGCTTACCATCACCATgttttagagctaGAAAtagcaagt	pVerispr-Puro-p53 construction
rev_Puro.p53	ACCGTGGGCTTGTACTCGGTTGAGGGCTTACCATCACCATCGGGGATCCCATGGTGGCgatcGCTAGCTtca
fwd_GFP-Tet1	atcttGTGGAAAGGACGAAACACCgGGCTGCTGTCAGGGAGCTCAgttttagagctaGAAAtagcaagt	pVerispr-GFP-Tet1 construction
rev_GFP-Tet1	GAACAGCTCCTCGCCCTTGCTCACCCATGAGCTCCCTGACAGCAGCCGGATCCCATGGTGGCgatcGCTAGCTtca
fwd_GFP-Tet2	atcttGTGGAAAGGACGAAACACCgAAAGTGCCAACAGATATCCgttttagagctaGAAAtagcaagt	pVerispr-GFP/Neo-Tet2 construction
rev_GFP-Tet2	GAACAGCTCCTCGCCCTTGCTCACGAAAGTGCCAACAGATATCCAGGGGATCCCATGGTGGCgatcGCTAGCTtca
rev_Neo-Tet2	TGCGTGCAATCCATCTTGTTCAATGAAAGTGCCAACAGATATCCAGGGGATCCCATGGTGGCgatcGCTAGCTtca
fwd_GFP-Tet3	atcttGTGGAAAGGACGAAACACCgAAGGAGGGGAAGAGTTCTCGgttttagagctaGAAAtagcaagt	pVerispr-GFP-Tet3 construction
rev_GFP-Tet3	GAACAGCTCCTCGCCCTTGCTCACCCTCGAGAACTCTTCCCCTCCTTGGATCCCATGGTGGCgatcGCTAGCTtca
fwd_Neo.CMAH	atcttGTGGAAAGGACGAAACACCggaagctgccaatctcaaggagttttagagctaGAAAtagcaagt	pVerispr-Neo-CMAH construction
rev_Neo.CMAH	TGCGTGCAATCCATCTTGTTCAATgaagctgccaatctcaaggaaggGGATCCCATGGTGGCgatcGCTAGCTtca
fwd_GFP.GGTA1	atcttGTGGAAAGGACGAAACACCgctgcttgtctcaactgtaagttttagagctaGAAAtagcaagt	pVerispr-GFP-GGTA1 construction
rev_GFP.GGTA1	gctgcttgtctcaactgtaatggGGATCCCATGGTGGCgatcGCTAGCTtca
linker_CMAH-f	CATGgaagctgccaatctcaaggaagg	pV2.1GFP-CMAH construction
linker_CMAH-r	TCACccttccttgagattggcagcttc
linker_B4GalNT2-f	CATGTCCTCAGGTTCACTGCGGGGAGG	pV2.1GFP-B4GalNT2 construction
linker_B4GalNT2-r	TCACCCTCCCCGCAGTGAACCTGAGGA
linker_use1-f	AGCTTccgccggcgccatcttaataggtG	pV4.1R-USE1-TS1 construction
linker_use1-r	TCGACacctattaagatggcgccggcggA
linker_167A-f	AGCTTccattttcaactttcagagtctgG	pV4.1R-TMEM167A-TS28 construction
linker_167A-r	TCGACcagactctgaaagttgaaaatggA
sg_CMAH1-f	CACCgaagctgccaatctcaagga	pSg6-CMAH1 construction
sg_CMAH1-r	AAACtccttgagattggcagcttc
sg_B4GalNT2-TS1-f	CACCgTCCTCAGGTTCACTGCGGGG	pSg6-B4GalNT2-TS1 construction
sg_B4GalNT2-TS1-r	AAACCCCCGCAGTGAACCTGAGGAc
sg_USE1-TS1-f	CACCGacctattaagatggcgccgg	pSg6-USE1-TS1 construction
sg_USE1-TS1-r	aaacccggcgccatcttaataggtC
sg_USE1-TS3-f	CACCGtttctaaacgccactcgtcc	pSg6-USE1-TS3 construction
sg_USE1-TS3-r	aaacggacgagtggcgtttagaaaC
sg_167A-TS28-f	CACCGcagactctgaaagttgaaaa	pSg6-TMEM167A-TS28 construction
sg_167A-TS28-r	aaacttttcaactttcagagtctgC
sg_167A-TS18-f	CACCGtcctggacagaaataaaact	pSg6-TMEM167A-TS18 construction
sg_167A-TS18-r	aaacagttttatttctgtccaggaC
linker_Vero-use1-f	AGCTTgcggctactatcccgctgcgaggG	pV4.1R-Vero-USE1-TS1 construction
linker_Vero-use1-r	TCGACcctcgcagcgggatagtagccgcA
sg_Vero-USE1-f	CACCgcggctactatcccgctgcg	pSg6-Vero-USE1-TS1 construction
sg_Vero-USE1-r	AAACcgcagcgggatagtagccgc
fwd_Puro.CD46	atcttGTGGAAAGGACGAAACACCgaagggattctcgggacggcagttttagagctaGAAAtagcaagt	pVerispr-Puro-CD46 construction
rev_Puro.CD46	ACCGTGGGCTTGTACTCGGTccctgccgtcccgagaatcccttCATGGTGGCgatcGCTAGCTtca
fwd_Neo.B4	atcttGTGGAAAGGACGAAACACCgtcctcaggttcactgcgggggttttagagctaGAAAtagcaagt	pVerispr-Neo-B4GalNT2 construction
rev_Neo.B4	TGCAATCCATCTTGTTCAATcctccccgcagtgaacctgaggaCATGGTGGCgatcGCTAGCTtca
fwd_Hygro.GHR	atcttGTGGAAAGGACGAAACACCgttcatgccactggacagatggttttagagctaGAAAtagcaagt	pVerispr-Hygro-GHR construction
rev_Hygro.GHR	gcggtgagttcaggctttttccccatctgtccagtggcatgaacatGGTGGCCTtcacgacacctga
sg_CD47-f	cacc gctcggcgtactgcggtgag	pSg6-CD47 construction
sg_CD47-r	aaac ctcaccgcagtacgccgagc
sg_THBD-TS1-f	cacc g cggcgggggccagtactcca	pSg6-THBD-TS1 construction
sg_THBD-TS1-r	aaac tggagtactggcccccgccg c
sg_GGTA1-TS1-f	cacc gctgcttgtctcaactgtaa	pSg6-GGTA1-TS1 construction
sg_GGTA1-TS1-r	aaac ttacagttgagacaagcagc
sg_CD46-TS1-f	cacc g aagggattctcgggacggca	pSg6-CD46-TS1 construction
sg_CD46-TS1-r	aaac tgccgtcccgagaatccctt c
sg_GHR-f	cacc g ttcatgccactggacagatg	pSg6-GHR construction
sg_GHR-r	aaac catctgtccagtggcatgaa c
fwd_Puro.GGTA1	atcttGTGGAAAGGACGAAACACCgctgcttgtctcaactgtaagttttagagctaGAAAtagcaagt	pVerispr-Puro-GGTA1 construction
rev_Puro.GGTA1	ACCGTGGGCTTGTACTCGGTgctgcttgtctcaactgtaatggGGATCCCATGGTGGCgatcGCTAGCTtca
sg_B4GalNT2-TS2-f	CACCGaggaaagctataacttgg	pSg6-B4GalNT2-TS2 construction
sg_B4GalNT2-TS2-r	AAAC ccaagttatagctttcct C
sg_THBD-TS2-f	cacc g agcagtcatgctcgacgcac	pSg6-THBD-TS2 construction
sg_THBD-TS2-r	aaac gtgcgtcgagcatgactgct c
sg_GGTA1-TS2-f	cacc gagaaaataatgaatgtcaa	pSg6-GGTA1-TS2 construction
sg_GGTA1-TS2-r	aaac ttgacattcattattttctc
sg_CD46-TS2-f	cacc g cgcaaaacgccatcattttc	pSg6-CD46-TS2 construction
sg_CD46-TS2-r	aaac gaaaatgatggcgttttgcg c
Primers for genotyping
Primer name	Primer sequence	Note
BLMH-F	GACTTTTCTAATGGCGCTCTCA	the primers for genomic DNA targeting efficiency detection
BLMH-R	CCTATTATGAAAGGGCAGGCT
TRIM44-F	CTTCCCTGCTCCCTATCTCAG
TRIM44-R	TGAGTGTGTGCATGTCTCCT
Hprt-F	Gcctttagttttgcacacactg
Hprt-R	cgaggacctcttacaagcca
Cdkn2a-F	GTCAGAAGCTTTTGGACCAACT
Cdkn2a-R	ACAATCCCAGTTCGGCTTAAAG
Trp53-F	TTCATTAGTTCCCCACCTTGACAC
Trp53-R	AAAGTCAACATCAGTCTAGGCTGG
CMAH-F	gccattgaaaggaggggaga
CMAH-R	ggggaaatagcatgttgattgga
GGTA1-F	tatccttcccaacccagacg
GGTA1-R	gccggatccttaagccaaag
Tet1-Target-F	TTGTTCTCTCCTCTGACTGC
Tet1-Target-R	TGATTGATCAAATAGGCCTGC
Tet2-Target-F	CAGATGCTTAGGCCAATCAAG
Tet2-Target-R	AGAAGCAACACACATGAAGATG
Tet3-Target-F	CCACCTCTGAGCGCAGAGTG
Tet3-Target-R	GATGAACACAGTTCCTGACAG
B4-F	aaatacaccggaccgagctt
B4-R	cttccgctccatctcaggg
USE1-F	AAACAAGAATGGGACACCAAAC
USE1-R	CCTCTACCTGCGGGAATCAC
167A-F	tcttGGACATGtcattctgtttg
167A-R	aagacatttcaggtcacttctga
Vero-USE1-F	cttctgctccaaacaaagatgg
Vero-USE1-R	gagatcccctcaccttctcc
seq_CD46-f	attcttactcctgctgtcggaa
seq_CD46-r	atgggaagcaggaacactagg
seq_GHR-f	accgctctgaagctgtgacc
seq_GHR-r	caggagaccagagaccttatc
seq_CD47-f	cctgctccagacacctgag
seq_CD47-r	gctcccttgccaccttct
seq_THBD-f	CGCGCACTTATAAACTCGG
seq_THBD-r	ctcagtagcagggagatgacct
CMAH-L1	AACTCGTTAGGAGTAAATCCTGAGA
CMAH-L2	tgatgggcagccgctgtgttcaaag
CMAH-R1	CACTGCATTCTAGTTGTGGTTTGTC
CMAH-R2	gaagctaagtatgcagtgatgcaag
GGTA-L1	gactgtttgccacttgtgtgggtgc
GGTA-L2	tggctaatggccaatattgaACGCG
GGTA-R2	ccaagcggtatcaatgcctcttaag
EF1a-F	cagccgtcgcttcatgtgactcca	the primers for plasmid DNA targeting efficiency detection
GFP-R	GCATGGCGGACTTGAAGAAGTCGT
neo-R	CACTTCGCCCAATAGCAGCCAGTC
Puro-R	TTCGACGCTCTCCGGCGTGGTCCA
CD47-NGS-F	TCGTCGGCAGCGTCAGATGTGTATAAGAGACAGtgcctgctccagacacctgagg	the primers for on-targeting high-throughput sequencing
CD47-NGS-R	GTCTCGTGGGCTCGGAGATGTGTATAAGAGACAGcagacagggtgcagcccacaca
CMAH-NGS-F	TCGTCGGCAGCGTCAGATGTGTATAAGAGACAGctgtggagctgtcaatgctcag
CMAH-NGS-R	GTCTCGTGGGCTCGGAGATGTGTATAAGAGACAGcttacatgccttcaggcggctc
THBD-NGS-F	TCGTCGGCAGCGTCAGATGTGTATAAGAGACAGcttggcgtgctgacaccatgctc
THBD-NGS-R	GTCTCGTGGGCTCGGAGATGTGTATAAGAGACAGcaagcctggctggcagcgaggaa
GGTA1-NGS-F	TCGTCGGCAGCGTCAGATGTGTATAAGAGACAGaaccatattccactctgggtgtatt
GGTA1-NGS-R	GTCTCGTGGGCTCGGAGATGTGTATAAGAGACAGcaagctggtgacttggctgataac
CD46-NGS-F	TCGTCGGCAGCGTCAGATGTGTATAAGAGACAGggattcttactcctgctgtcgg
CD46-NGS-R	GTCTCGTGGGCTCGGAGATGTGTATAAGAGACAGggctcctacctgagggcatgg
B4-NGS-F2	TCGTCGGCAGCGTCAGATGTGTATAAGAGACAGaaatacaccggaccgagctt
B4-NGS-R2	GTCTCGTGGGCTCGGAGATGTGTATAAGAGACAGcttccgctccatctcaggg
GHR-NGS-F	TCGTCGGCAGCGTCAGATGTGTATAAGAGACAGcggcagattcttctggaaagcc
GHR-NGS-R	GTCTCGTGGGCTCGGAGATGTGTATAAGAGACAGaggcatgaaggctgtaccttc
CD47-OT1-F2	TCGTCGGCAGCGTCAGATGTGTATAAGAGACAGcaggagccgggtactggaggc	the primers for off-targeting high-throughput sequencing
CD47-OT1-R2	GTCTCGTGGGCTCGGAGATGTGTATAAGAGACAGggactccacacccacttcccac
CD47-OT2-F	TCGTCGGCAGCGTCAGATGTGTATAAGAGACAGCAGCGGGCGATGCGACGGTTTG
CD47-OT2-R	GTCTCGTGGGCTCGGAGATGTGTATAAGAGACAGGGCCATGGCCTCGGTGGTGGAG
CD47-OT3-F2	TCGTCGGCAGCGTCAGATGTGTATAAGAGACAGgatgatccatcagatagctggtac
CD47-OT3-R2	GTCTCGTGGGCTCGGAGATGTGTATAAGAGACAGaccatgatcaaagagcaagcttg
CMAH-OT1-F2	TCGTCGGCAGCGTCAGATGTGTATAAGAGACAGcagagaggcatgtctatgctcc
CMAH-OT1-R2	GTCTCGTGGGCTCGGAGATGTGTATAAGAGACAGggaaatcacaggtctgaattgg
CMAH-OT2-F	TCGTCGGCAGCGTCAGATGTGTATAAGAGACAGCTGGTATGATAGAGACTCTACAGT
CMAH-OT2-R	GTCTCGTGGGCTCGGAGATGTGTATAAGAGACAGGATCTTAAGTAGCGAGGTAATTTC
CMAH-OT3-F	TCGTCGGCAGCGTCAGATGTGTATAAGAGACAGGTTCCACCTCCCCAGCTTGA
CMAH-OT3-R	GTCTCGTGGGCTCGGAGATGTGTATAAGAGACAGAGGCTATTGCACTGGGTTGT
CMAH-OT4-F	TCGTCGGCAGCGTCAGATGTGTATAAGAGACAGCCTGAGAACTCTTGGACTGC
CMAH-OT4-R	GTCTCGTGGGCTCGGAGATGTGTATAAGAGACAGTGTACAGCATGGTGACCCAG
CMAH-OT5-F	TCGTCGGCAGCGTCAGATGTGTATAAGAGACAGTGGGTTGCTACCTGTGCCAG
CMAH-OT5-R	GTCTCGTGGGCTCGGAGATGTGTATAAGAGACAGGAGGCACAGTCTGGGTATCC
CMAH-OT6-F	TCGTCGGCAGCGTCAGATGTGTATAAGAGACAGGAGTCCAGGCTCTGTGCTAG
CMAH-OT6-R	GTCTCGTGGGCTCGGAGATGTGTATAAGAGACAGCACTAAAGGGGCTGCCTTGGT
THDB-OT1-F	TCGTCGGCAGCGTCAGATGTGTATAAGAGACAGCAGCTCTGTGTCACCCCAGG
THDB-OT1-R	GTCTCGTGGGCTCGGAGATGTGTATAAGAGACAGCAAATCCAGGGCTCCAGCTC
THDB-OT2-F	TCGTCGGCAGCGTCAGATGTGTATAAGAGACAGGAGCTGCAGGTCCCCTGCTC
THDB-OT2-R	GTCTCGTGGGCTCGGAGATGTGTATAAGAGACAGGGATCTTGGAGGACCCACGC
THDB-OT3-F	TCGTCGGCAGCGTCAGATGTGTATAAGAGACAGGACCCAACTCTGCCCCCTAG
THDB-OT3-R	GTCTCGTGGGCTCGGAGATGTGTATAAGAGACAGAGATGAGGGTCTCCGGTACTC
THDB-OT4-F	TCGTCGGCAGCGTCAGATGTGTATAAGAGACAGACCCCTTAGGGATGATGCACAG
THDB-OT4-R	GTCTCGTGGGCTCGGAGATGTGTATAAGAGACAGGGGATGGGAAAGACACTGTGG
THDB-OT5-F	TCGTCGGCAGCGTCAGATGTGTATAAGAGACAGCCCTGCACAGCTTCTTGTTATC
THDB-OT5-R	GTCTCGTGGGCTCGGAGATGTGTATAAGAGACAGGGCCGGATCTTGGCTAGCTC
THDB-OT6-F	TCGTCGGCAGCGTCAGATGTGTATAAGAGACAGGAGCACAGGGATTTAGAAACC
THDB-OT6-R	GTCTCGTGGGCTCGGAGATGTGTATAAGAGACAGATCAGCTCCCATCTGCCACA
GGTA1-OT1-F2	TCGTCGGCAGCGTCAGATGTGTATAAGAGACAGTGTGGGCAAaataactaattttagcac
GGTA1-OT1-R2	GTCTCGTGGGCTCGGAGATGTGTATAAGAGACAGAATTTGGTCAGCCCAGAaagtgg
GGTA1-OT2-F	TCGTCGGCAGCGTCAGATGTGTATAAGAGACAGCAAGACCATTTGAGAGCAGGG
GGTA1-OT2-R	GTCTCGTGGGCTCGGAGATGTGTATAAGAGACAGGCATACACCTGTTGATGAATG
GGTA1-OT3-F	TCGTCGGCAGCGTCAGATGTGTATAAGAGACAGGCACCACAAGAGGAACTCCAAG
GGTA1-OT3-R	GTCTCGTGGGCTCGGAGATGTGTATAAGAGACAGGTATCATCAAACAGGGAAACATCC
GGTA1-OT4-F	TCGTCGGCAGCGTCAGATGTGTATAAGAGACAGGGGTGCACAATACCAAGCCCT
GGTA1-OT4-R	GTCTCGTGGGCTCGGAGATGTGTATAAGAGACAGCGCTAAGGATTGTGACAGTTG
GGTA1-OT5-F2	TCGTCGGCAGCGTCAGATGTGTATAAGAGACAGCTGCTCTCTACTATGTgaagactgg
GGTA1-OT5-R2	GTCTCGTGGGCTCGGAGATGTGTATAAGAGACAGtctacatcagggatgattttgaacc
GGTA1-OT6-F	TCGTCGGCAGCGTCAGATGTGTATAAGAGACAGCGGGGCCTGGAAATAGCGCA
GGTA1-OT6-R	GTCTCGTGGGCTCGGAGATGTGTATAAGAGACAGGCATTTCAAGTCTCAGCCCC
CD46-OT1-F	TCGTCGGCAGCGTCAGATGTGTATAAGAGACAGCCTCTTGGAGCCTCTCGCTC
CD46-OT1-R	GTCTCGTGGGCTCGGAGATGTGTATAAGAGACAGTCCTCCGAGCAGAAGCAAGG
CD46-OT2-F	TCGTCGGCAGCGTCAGATGTGTATAAGAGACAGACCAAAGAGGCAAGATGCCA
CD46-OT2-R	GTCTCGTGGGCTCGGAGATGTGTATAAGAGACAGATGGCAGAGGCAGCTTGTGC
CD46-OT3-F	TCGTCGGCAGCGTCAGATGTGTATAAGAGACAGGCAGAAGAGCTGACTCTAAAGGTCA
CD46-OT3-R	GTCTCGTGGGCTCGGAGATGTGTATAAGAGACAGCTTGTGTTTCAAGAAGAGGATGC
CD46-OT4-F2	TCGTCGGCAGCGTCAGATGTGTATAAGAGACAGTATCCTCTGCTTAAGGGCttggc
CD46-OT4-R2	GTCTCGTGGGCTCGGAGATGTGTATAAGAGACAGaaccttggaaatttcatgcaca
CD46-OT5-F	TCGTCGGCAGCGTCAGATGTGTATAAGAGACAGCCGAAAAGGAAACGCTGAGC
CD46-OT5-R	GTCTCGTGGGCTCGGAGATGTGTATAAGAGACAGCTCCCTCAGCGCCCTGAGGA
CD46-OT6-F	TCGTCGGCAGCGTCAGATGTGTATAAGAGACAGCGTGATCCTGGAGGGCCTTA
CD46-OT6-R	GTCTCGTGGGCTCGGAGATGTGTATAAGAGACAGCCTGGCCCATATGCCTCTGG
B4-OT1-F	TCGTCGGCAGCGTCAGATGTGTATAAGAGACAGCTCTTGTCTGATGAAAGCTACTG
B4-OT1-R	GTCTCGTGGGCTCGGAGATGTGTATAAGAGACAGGCAGGGAGCAGAGAGAGCTA
B4-OT2-F2	TCGTCGGCAGCGTCAGATGTGTATAAGAGACAGCCCAATCTgtgatctttgaccttg
B4-OT2-R2	GTCTCGTGGGCTCGGAGATGTGTATAAGAGACAGGaaagtgttcgagctcagcctg
B4-OT3-F	TCGTCGGCAGCGTCAGATGTGTATAAGAGACAGGCAAGCCAATGAAGATGGGT
B4-OT3-R	GTCTCGTGGGCTCGGAGATGTGTATAAGAGACAGCACACGAGGCACCAATCCGT
B4-OT4-F	TCGTCGGCAGCGTCAGATGTGTATAAGAGACAGCGTACCTGGGAGTGAGGGATTG
B4-OT4-R	GTCTCGTGGGCTCGGAGATGTGTATAAGAGACAGCTGGAGGCAGGCTGAGGATGG
B4-OT5-F	TCGTCGGCAGCGTCAGATGTGTATAAGAGACAGGTCCCGAGGCACTCTTGAAC
B4-OT5-R	GTCTCGTGGGCTCGGAGATGTGTATAAGAGACAGACAGTCTGGCCAAAGCCTGG
B4-OT6-F	TCGTCGGCAGCGTCAGATGTGTATAAGAGACAGCAGCAGTAGCAAGGCCCTTGAG
B4-OT6-R	GTCTCGTGGGCTCGGAGATGTGTATAAGAGACAGGTGCTCCCATACTCAGAGTGTGTC
GHR-OT1-F	TCGTCGGCAGCGTCAGATGTGTATAAGAGACAGACAGCTGAGCAAACCATGCC
GHR-OT1-R	GTCTCGTGGGCTCGGAGATGTGTATAAGAGACAGCTGTCCATGGGTGATTGTCAA
GHR-OT2-F	TCGTCGGCAGCGTCAGATGTGTATAAGAGACAGCAAGGTCCTCACCAGCCTGCA
GHR-OT2-R	GTCTCGTGGGCTCGGAGATGTGTATAAGAGACAGTGGTTCACTGAGGGGATAATCAG
GHR-OT3-F	TCGTCGGCAGCGTCAGATGTGTATAAGAGACAGGACTTGGGATCCACTGCAACAGCA
GHR-OT3-R	GTCTCGTGGGCTCGGAGATGTGTATAAGAGACAGCTACCGCATTGAGTTGTATCCAGG
DX1662-qpcr-TBM1	ATTGGCACCGACTGTGACTC
DX1663-qpcr-TBM1	AGATGCCTATGAGCAAGCCC
DX1664-qpcr-TBM2	TGTTTTGCAACCAGACTGCC
DX1665-qpcr-TBM2	GTGCAGATGAAACCGTCGTC
DX1666-qpcr-TBM3	GTCTCGATCACCTACGGCAC
DX1667-qpcr-TBM3	ATTAGCTGTAAGCCGAGGGG
DX1668-qpcr-CD55-1	CTGGCGAGAAGGACTCAGTG
DX1669-qpcr-CD55-1	CGCAGCTACGATTGCAGAAC
DX1670-qpcr-CD55-2	ACCACCACACCAAATGCTCA
DX1671-qpcr-CD55-2	CCCAAGCAAACCTGTCAACG
DX1672-qpcr-CD55-3	GTGCCGTCCAGGTTACAGAA
DX1673-qpcr-CD55-3	TCTCCCGGATTAGGGCATGA
DXY534-qpcr-GAPDH	GTCGGTTGTGGATCTGACCT
DXY535-qpcr-GAPDH	GTCCTCAGTGTAGCCCAGGA
