# Supplementary material for: Homozygous editing of multiple genes for accelerated generation of xenotransplantation pigs
Source: HighWire-hosted journal article supplement (doi:10.1101/gr.279709.124), 2025-03-05
Supplement: Supplemental_Tables_S1-S3.docx [file Supplemental_Tables_S1-S3.docx]

Table S1. The sgRNA and surrogate target site sequences used in Figures 1-6.

|  | Gene | SgRNA & Target site |
| --- | --- | --- |
| Fig.1 & Fig.2 | CMAH-sgRNA1 | GAAGCTGCCAATCTCAAGGA |
| Surrogate  CMAH-TS1 | GAAGCTGCCAATCTCAAGGA**AGG** |
| BLMH-sgRNA | CGTGTCATGAGTTCATTGGT |
| Surrogate  BLMH-TS | CGTGTCATGAGTTCATTGGT**GGG** |
| TRIM44-sgRNA | AGCTTGATATAATCCAGTAT |
| Surrogate  TRIM44-TS | AGCTTGATATAATCCAGTAT**TGG** |
| HPRT-sgRNA | TCTTAACCGTAATCAGCCTC |
| Surrogate  HPRT-TS | TCTTAACCGTAATCAGCCTC**TGG** |
| Cdkn2b-sgRNA | GCAGCACGACAAGCGTGTCC |
| Surrogate  Cdkn2b-TS | GCAGCACGACAAGCGTGTCC**AGG** |
| Trp53-sgRNA | TGAGGGCTTACCATCACCAT |
| Surrogate  Trp53-TS | TGAGGGCTTACCATCACCAT**CGG** |
| GGTA1-sgRNA1 | GCTGCTTGTCTCAACTGTAA |
| Surrogate  GGTA1-TS1 | GCTGCTTGTCTCAACTGTAA**TGG** |
| Tet1-sgRNA | GGCTGCTGTCAGGGAGCTCA |
| Surrogate  Tet1-TS | GGCTGCTGTCAGGGAGCTCA**TGG** |
| Tet2-sgRNA | GAAAGTGCCAACAGATATCC |
| Surrogate  Tet2-TS | GAAAGTGCCAACAGATATCC**AGG** |
| Tet3-sgRNA | AAGGAGGGGAAGAGTTCTCG |
| Surrogate  Tet3-TS | AAGGAGGGGAAGAGTTCTCG**AGG** |
| Fig.3 | CMAH-sgRNA1 | GAAGCTGCCAATCTCAAGGA |
| Surrogate  CMAH-TS1 | GAAGCTGCCAATCTCAAGGA**AGG** |
| B4GALNT2-sgRNA1 | TCCTCAGGTTCACTGCGGGG |
| Surrogate  B4GALNT2-TS1 | TCCTCAGGTTCACTGCGGGG**AGG** |
| USE1-sgRNA | ACCTATTAAGATGGCGCCGG |
| Surrogate  USE1-TS | ACCTATTAAGATGGCGCCGG**CGG** |
| TMEM167A-sgRNA | CAGACTCTGAAAGTTGAAAA |
| Surrogate  TMEM167A-TS | CAGACTCTGAAAGTTGAAAA**TGG** |
| GGTA1-sgRNA1 | GCTGCTTGTCTCAACTGTAA |
| Surrogate  GGTA1-TS1 | GCTGCTTGTCTCAACTGTAA**TGG** |
| Fig.4 - Fig.6  (seven gene editing) | CD47-sgRNA | GCTCGGCGTACTGCGGTGAG |
| CD46-sgRNA1 | CGCAAAACGCCATCATTTTC |
| CD46-sgRNA2 | AAGGGATTCTCGGGACGGCA |
| GHR-sgRNA | TTCATGCCACTGGACAGATG |
| CMAH-sgRNA1 | GAAGCTGCCAATCTCAAGGA |
| CMAH-sgRNA2 | TCATAGCATCGAACAAACGA |
| THBD-sgRNA1 | GGCGGGGGCCAGTACTCCA |
| THBD-sgRNA2 | AGCAGTCATGCTCGACGCAC |
| GGTA1-sgRNA1 | GCTGCTTGTCTCAACTGTAA |
| GGTA1-sgRNA2 | GAGAAAATAATGAATGTCAA |
| B4GALNT2-sgRNA1 | TCCTCAGGTTCACTGCGGGG |
| B4GALNT2-sgRNA2 | AGGAAAGCTATAACTTGG |
| Surrogate  B4GALNT2-TS1 | TCCTCAGGTTCACTGCGGGG**AGG** |

Table S2. Plasmids used in seven gene editing experiment.

|  | Plasmids | Dosage (μg/106 cells) |
| --- | --- | --- |
| MV014 | pM3-Cas9 | 6 μg |
| pV2.1G-B4GALNT2-TS1 | 3 μg |
| pSg6-CD47-TS | 0.5 μg |
| pSg6-CMAH-TS1 | 0.5 μg |
| pSg6-CMAH-TS2 | 0.5 μg |
| pSg6-THBD-TS1 | 0.5 μg |
| pSg6-THBD-TS2 | 0.5 μg |
| pSg6-GGTA1-TS1 | 0.5 μg |
| pSg6-GGTA1-TS2 | 0.5 μg |
| pSg6-CD46-TS1 | 1 μg |
| pSg6-CD46-TS2 | 1 μg |
| pSg6-B4GALNT2-TS1 | 1 μg |
| pSg6-B4GALNT2-TS2 | 1 μg |
| pSg6-GHR-TS | 1 μg |
| MV020-025 | pM2-Cas9-GFP | 6 μg |
| pSg6-CD47-TS | 0.5 μg |
| pSg6-CMAH-TS1 | 0.5 μg |
| pSg6-CMAH-TS2 | 0.5 μg |
| pSg6-THBD-TS1 | 0.5 μg |
| pSg6-THBD-TS2 | 0.5 μg |
| pSg6-GGTA1-TS1 | 0.5 μg |
| pSg6-GGTA1-TS2 | 0.5 μg |
| pSg6-CD46-TS1 | 0.5 μg |
| pSg6-CD46-TS2 | 0.5 μg |
| pSg6-B4GALNT2-TS1 | 0.5 μg |
| pSg6-B4GALNT2-TS2 | 0.5 μg |
| pSg6-GHR-TS | 0.5 μg |
| pVerisprPuro-CD46-TS1 | 1.5 μg |
| pVerisprNeo-B4GALNT2-TS1 | 1.5 μg |
| pVerisprHygro-GHR-TS | 1.5 μg |

Table S3. Genotyping of colonies targeting *GGTA1, CMAH*, and *B4GALNT2* genes in PFFs.

|  | *GGTA1* | *CMAH* | *B4GALNT2* | *GGTA1*  *CMAH* | *GGTA1*  *CMAH*  *B4GALNT2* | Total |
| --- | --- | --- | --- | --- | --- | --- |
| Edited | 52 | 74 | 21 | 49 | 17 | 91 |
| Homozygous | 31 | 54 | 2 | 26 | 2 | 91 |
